# Supplementary material for: Does gold behaves as hydrogen? A joint theoretical and experimental study
Source: Royal Society of Chemistry journal article supplement (doi:10.1039/c9na00780f), 2020-01-01
Supplement: c9na00780f1.pdf [file c9na00780f1.pdf]

Supplementary Information for

**Gold behaves as hydrogen? A joint theoretical and  
experimental study**

Zhengbo Qin<sup>1,\*</sup>, Jiangle Zhang<sup>1,2</sup>, Chen Wang<sup>1</sup>, Lin Wang<sup>1</sup>, and Zichao Tang<sup>2,\*</sup>

*<sup>1</sup>Anhui Province Key Laboratory of Optoelectric Materials Science and Technology, Department of Physics, Anhui Normal University, Wuhu, Anhui 241000, China*

*<sup>2</sup>State Key Laboratory of Physical Chemistry of Solid Surfaces, Department of Chemistry, College of Chemistry and Chemical Engineering, Xiamen University, Xiamen 361005, China*

Corresponding author: [wave0403@163.com](mailto:wave0403@163.com); [zctang@xmu.edu.cn](mailto:zctang@xmu.edu.cn);

**Table S1:** Observed and calculated vertical (VDE) and adiabatic (ADE) detachment energies for  $M(\text{SCH}_3)_2^-$  ( $M = \text{Cu}, \text{Ag}, \text{Au}$  and  $\text{H}$ ) at the level of B3LYP/aug-cc-pVTZ(-pp) including ZPEs.

| <b>M</b>  | <b>ADE [eV]</b>   | <b>Feature</b> | <b>VDE [eV]</b> |                         |
|-----------|-------------------|----------------|-----------------|-------------------------|
|           |                   |                | <b>Exp.</b>     | <b>Theo.<br/>TD-DFT</b> |
| <b>Cu</b> | 2.97(3)           | X              | 3.34(3)         | 3.07                    |
|           | 2.69 <sup>a</sup> | A              | 3.34(3)         | 3.10                    |
|           |                   | B              | 3.96(3)         | 3.61                    |
|           |                   | C              | 4.29(2)         | 3.97                    |
| <b>Ag</b> | 3.32(3)           | X              | 3.64(3)         | 3.28                    |
|           | 2.98 <sup>a</sup> | A              | 3.82(3)         | 3.39                    |
|           |                   | B              | 4.20(2)         | 3.88                    |
|           |                   | C              | 4.39(2)         | 3.97                    |
| <b>Au</b> | 3.06(3)           | X              | 3.46(3)         | 3.26                    |
|           | 2.81 <sup>a</sup> | A              | 3.70(3)         | 3.51                    |
|           |                   | B              | 4.40(2)         | 4.19                    |
| <b>H</b>  | 2.30(3)           | X              | 2.62(3)         | 2.72                    |
|           | 2.39 <sup>a</sup> | A              | 2.84(2)         | 2.86                    |

<sup>a</sup>Theoretical result.

**Table S2:** Observed and calculated vertical (VDE) and adiabatic (ADE) detachment energies for  $M(\text{SCH}_3)_2^-$  ( $M = \text{Cu, Ag, Au}$  and  $\text{H}$ ) at the level of  $\text{wb97XD/aug-cc-pVTZ(-pp)}$  including ZPEs.

| <b>M</b>  | <b>ADE [eV]</b>   | <b>Feature</b> | <b>VDE [eV]</b> |                         |
|-----------|-------------------|----------------|-----------------|-------------------------|
|           |                   |                | <b>Exp.</b>     | <b>Theo.<br/>TD-DFT</b> |
| <b>Cu</b> | 2.97(3)           | X              | 3.34(3)         | 3.28                    |
|           | 2.89 <sup>a</sup> | A              | 3.34(3)         | 3.31                    |
|           |                   | B              | 3.96(3)         | 3.82                    |
|           |                   | C              | 4.29(2)         | 4.18                    |
| <b>Ag</b> | 3.32(3)           | X              | 3.64(3)         | 3.62                    |
|           | 3.26 <sup>a</sup> | A              | 3.82(3)         | 3.73                    |
|           |                   | B              | 4.20(2)         | 4.22                    |
|           |                   | C              | 4.39(2)         | 4.31                    |
| <b>Au</b> | 3.06(3)           | X              | 3.46(3)         | 3.54                    |
|           | 3.00 <sup>a</sup> | A              | 3.70(3)         | 3.79                    |
|           |                   | B              | 4.40(2)         | 4.47                    |
| <b>H</b>  | 2.30(3)           | X              | 2.62(3)         | 2.67                    |
|           | 2.36 <sup>a</sup> | A              | 2.84(2)         | 2.81                    |

<sup>a</sup>Theoretical result.

**Table S3:** Natural atomic orbital analyses for the ground state of  $M(\text{SCH}_3)_2^-$  ( $M = \text{Cu}$ , Ag, Au and H) at the CAM-B3LYP/aug-cc-pVTZ(-pp) level.

| Species | MO     | Contribution from M, S and H atomic orbitals                    |
|---------|--------|-----------------------------------------------------------------|
| M = Cu  | HOMO   | 38% S(1) 3p + 17% Cu 3d + 38% S(2) 3p                           |
|         | HOMO-1 | 38% S(1) 3p + 17% Cu 3d + 38% S(2) 3p                           |
|         | HOMO-2 | 11% S(1) 3p + 48% Cu 3d + 25% Cu 4s + 11% S(2) 3p               |
|         | HOMO-3 | 42% S(1) 3p + 6% Cu 3p + 42% S(2) 3p                            |
| M = Ag  | HOMO   | 42% S(1) 3p + 10% Ag 4d + 41% S(2) 3p                           |
|         | HOMO-1 | 42% S(1) 3p + 10% Ag 4d + 42% S(2) 3p                           |
|         | HOMO-2 | 32% S(1) 3p + 11% Ag 4p + 32% S(2) 3p                           |
|         | HOMO-3 | 19% S(1) 3p + 26% Ag 4d + 27% Ag 5s + 19% S(2) 3p               |
| M = Au  | HOMO   | 38% S(1) 3p + 14% Au 5d + 1% Au 6s + 38% S(2) 3p                |
|         | HOMO-1 | 38% S(1) 3p + 14% Au 5d + 1% Au 6s + 38% S(2) 3p                |
|         | HOMO-2 | 6% S(1) 3s + 28% S(1) 3p + 17% Au 5p + 6% S(2) 3s + 28% S(2) 3p |
|         | HOMO-3 | 9% S(1) 3p + 24% Au 5d + 51% Au 6s + 9% S(2) 3p                 |
| M = H   | HOMO   | 77% S(1) 3p <sup>a</sup> + 1% H 1s + 2% C 2p + 17% S(2) 3p      |
|         | HOMO-1 | 92% S(1) 3p                                                     |

<sup>a</sup> The S denotes the sulfur atom in  $\text{CH}_3\text{S}^-$  group.

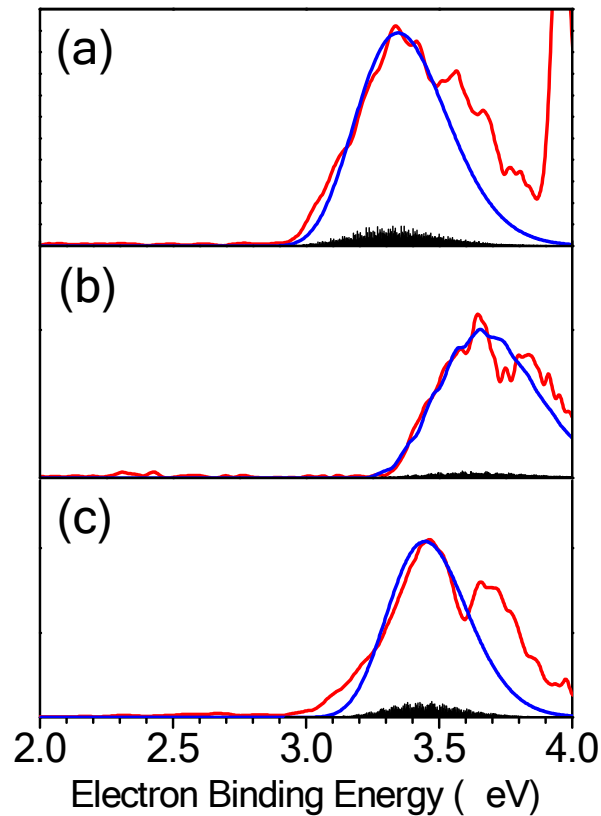

**Figure S1.** Franck-Condon simulations using the PESCAL program<sup>S1</sup> for the photodetachment in first spectral band X: (a)  $\text{Cu}(\text{SCH}_3)_2^-$ , (b)  $\text{Ag}(\text{SCH}_3)_2^-$ , and (c)  $\text{Au}(\text{SCH}_3)_2^-$ . Red curves stand for the experimental data, blue curves for Franck-Condon (FC) simulated results, and black sticks for simulated vibronic transitions. The individual vibrational peaks contours are approximated as a Gaussian function with 0.01 eV FWHM (full width at half-maximum). And the simulated vibrational temperature of  $\sim 100$  K was adopted for anions.

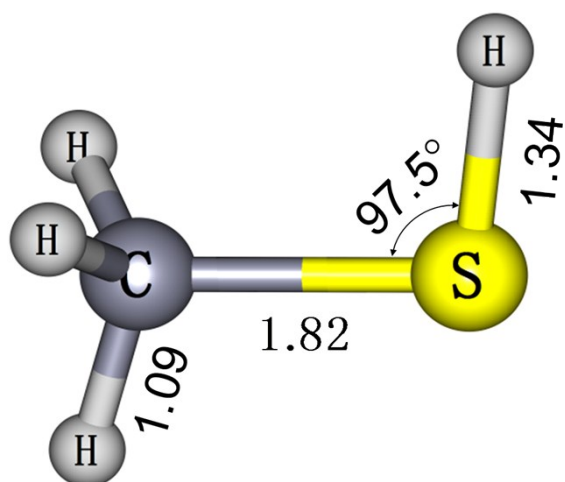

**Figure S2.** Optimized structures for CH<sub>3</sub>SH at the CAM-B3LYP/aug-cc-pVTZ(-pp) level.

**Table S4** Cartesian coordinates of  $\text{Cu}(\text{SCH}_3)_2^-$ ,  $\text{Ag}(\text{SCH}_3)_2^-$ ,  $\text{Au}(\text{SCH}_3)_2^-$ ,  $\text{H}(\text{SCH}_3)_2^-$  and  $\text{CH}_3\text{SH}$  calculated at the level of CAM-B3LYP/aug-cc-pVTZ(-PP).

| Symmetry C2 | $\text{Cu}(\text{SCH}_3)_2^-$ |              |              |
|-------------|-------------------------------|--------------|--------------|
| C           | 0.000000000                   | 2.938198000  | -0.922469000 |
| H           | 1.052800000                   | 3.019844000  | -0.658290000 |
| S           | -0.927525000                  | 1.950137000  | 0.309631000  |
| H           | -0.071355000                  | 2.505021000  | -1.918598000 |
| H           | -0.422858000                  | 3.942296000  | -0.955653000 |
| C           | 0.000000000                   | -2.938198000 | -0.922469000 |
| H           | -1.052800000                  | -3.019844000 | -0.658290000 |
| S           | 0.927525000                   | -1.950137000 | 0.309631000  |
| H           | 0.071355000                   | -2.505021000 | -1.918598000 |
| H           | 0.422858000                   | -3.942296000 | -0.955653000 |
| Cu          | 0.000000000                   | 0.000000000  | 0.283673000  |

| Symmetry C2 | $\text{Ag}(\text{SCH}_3)_2^-$ |              |              |
|-------------|-------------------------------|--------------|--------------|
| C           | -3.051445000                  | -0.982936000 | -0.607129000 |
| H           | -2.892345000                  | -0.729319000 | -1.653698000 |
| S           | -2.305819000                  | 0.260626000  | 0.509125000  |
| H           | -2.644949000                  | -1.977114000 | -0.429546000 |
| H           | -4.125601000                  | -1.016664000 | -0.424166000 |
| C           | 3.051340000                   | -0.983206000 | 0.606871000  |
| H           | 2.891489000                   | -0.730403000 | 1.653520000  |
| S           | 2.305864000                   | 0.260816000  | -0.508975000 |
| H           | 2.645375000                   | -1.977430000 | 0.428334000  |
| H           | 4.125626000                   | -1.016352000 | 0.424548000  |
| Ag          | 0.000007000                   | 0.231938000  | 0.000003000  |

| Symmetry C2 | $\text{Au}(\text{SCH}_3)_2^-$ |             |              |
|-------------|-------------------------------|-------------|--------------|
| C           | 0.000000000                   | 3.075636000 | -1.032956000 |
| H           | 1.054643000                   | 3.133738000 | -0.771635000 |
| S           | -0.945010000                  | 2.115497000 | 0.203529000  |

|    |              |              |              |
|----|--------------|--------------|--------------|
| H  | -0.087375000 | 2.641513000  | -2.026841000 |
| H  | -0.405337000 | 4.087242000  | -1.060917000 |
| Au | 0.000000000  | 0.000000000  | 0.172168000  |
| C  | 0.000000000  | -3.075636000 | -1.032956000 |
| H  | -1.054643000 | -3.133738000 | -0.771635000 |
| S  | 0.945010000  | -2.115497000 | 0.203529000  |
| H  | 0.087375000  | -2.641513000 | -2.026841000 |
| H  | 0.405337000  | -4.087242000 | -1.060917000 |

| Symmetry C1 | H(SCH <sub>3</sub> ) <sub>2</sub> <sup>-</sup> |              |              |
|-------------|------------------------------------------------|--------------|--------------|
| C           | -2.026059000                                   | -0.772288000 | 0.712035000  |
| H           | -2.340365000                                   | -1.712769000 | 0.255288000  |
| S           | -1.612856000                                   | 0.479638000  | -0.551428000 |
| H           | -1.159415000                                   | -0.980521000 | 1.343833000  |
| H           | -2.835373000                                   | -0.430699000 | 1.359942000  |
| C           | 1.948968000                                    | -0.858966000 | -0.662477000 |
| H           | 2.192042000                                    | -1.782251000 | -0.139442000 |
| S           | 1.646354000                                    | 0.498332000  | 0.510352000  |
| H           | 1.035424000                                    | -1.003369000 | -1.237560000 |
| H           | 2.764597000                                    | -0.612180000 | -1.339827000 |
| H           | 0.269683000                                    | 0.661788000  | 0.117648000  |

| Symmetry Cs | CH <sub>3</sub> SH |              |              |
|-------------|--------------------|--------------|--------------|
| C           | -0.047838000       | 1.151235000  | 0.000000000  |
| H           | 0.430779000        | 1.547185000  | 0.890515000  |
| S           | -0.047838000       | -0.663784000 | 0.000000000  |
| H           | 0.430779000        | 1.547185000  | -0.890515000 |
| H           | -1.090616000       | 1.457020000  | 0.000000000  |
| H           | 1.281501000        | -0.838246000 | 0.000000000  |



## References

S1. K. M. Ervin, T. M. Ramond, G. E. Davico, R. L. Schwartz, S. M. Casey, W. C. Lineberger, *J. Phys. Chem. A* 2001, **105**, 10822–10831.
